# Supplementary material
Source: MDPI journal article supplement (https://www.mdpi.com/2073-4395/9/7/395)
Supplement: s1 [file s1]

## Supplementary Materials

**Table S1.** Significance of chemical treatment (ABA), water treatment (W) and their interactions on flower number (pot<sup>-1</sup>), pod number (pot<sup>-1</sup>), flower abortion (%), seed number (pot<sup>-1</sup>), hundred-grain weight (g), grain yield (pot<sup>-1</sup>), water use efficiency for grain yield (g L<sup>-1</sup>), water use (L pot<sup>-1</sup>) and harvest index in jindou 19 (JD) with and without 10 µM exogenous ABA at 45 days after sowing (DAS) under three water treatments (well-watered(WW): maintain soil water content between 70%–90%; moderate water deficit (MWD): maintain SWC between 45–55% and severe water deficit (SWD): maintain SWC between 30%–35%). n.s. not significant, \*  $p < 0.05$ , \*\*  $p < 0.01$ , and \*\*\*  $p < 0.001$ . The values in parenthesis are the LSD at  $p = 0.05$ .

| Source of Variability                                     | ABA     | W         | ABA*W   |
|-----------------------------------------------------------|---------|-----------|---------|
| Flower number (pot <sup>-1</sup> )                        | n.s.    | ***(33)   | n.s.    |
| Pod number (pot <sup>-1</sup> )                           | n.s.    | ***(6.7)  | n.s.    |
| Flower abortion (%)                                       | n.s.    | ***(3.2)  | n.s.    |
| Seed number (pot <sup>-1</sup> )                          | n.s.    | ***(13)   | n.s.    |
| Hundred-grain weight (g)                                  | **(0.5) | ***(0.6)  | n.s.    |
| Grain yield (pot <sup>-1</sup> )                          | n.s.    | ***(1.7)  | n.s.    |
| Water use efficiency for grain yield (g L <sup>-1</sup> ) | n.s.    | ***(0.03) | *(0.04) |
| Water use (L pot <sup>-1</sup> )                          | **(0.7) | ***(0.9)  | *(1.2)  |
| Harvest index                                             | n.s.    | ***(0.01) | n.s.    |
